# Supplementary material for: Prediction of antiviral drugs against African swine fever viruses based on protein–protein interaction analysis
Source: PeerJ journal article supplement (doi:10.7717/peerj.8855), 2020-04-01

## Supplementary Figures

**Figure S1.** Contribution energy for each residue in the template (A) and modelled complex between Geldanamycin and swine HSP90AB1 (B). MM: contains van der Waals, electrostatic interactions, and net non-bonded potential energy between the protein and inhibitor; Polar: polar solvation energy; APolar: non-polar solvation energy; Total: total energy.

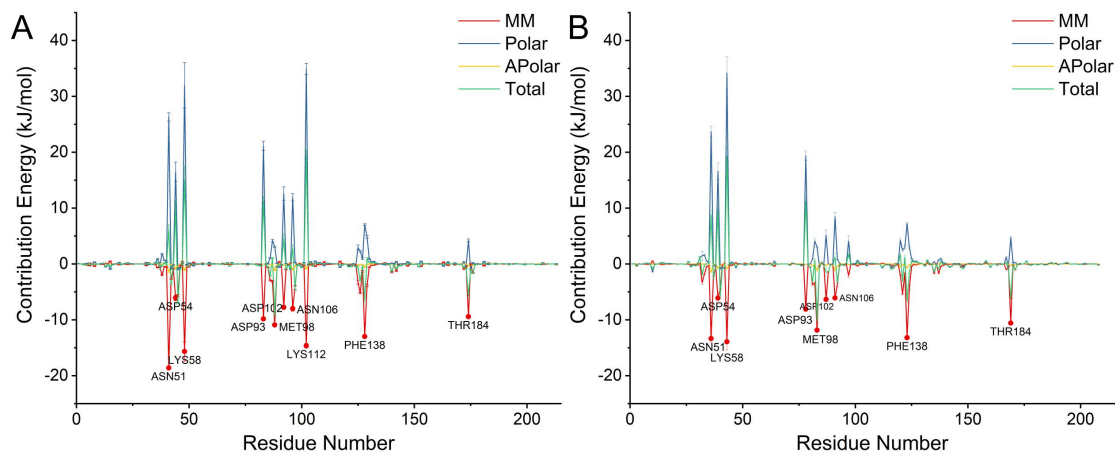

Supplement: supplementaryFigures_1.pdf [file supplementaryFigures_1.pdf]
