# Supplementary material for: Prediction of antiviral drugs against African swine fever viruses based on protein–protein interaction analysis
Source: PeerJ journal article supplement (doi:10.7717/peerj.8855), 2020-04-01

**Figure S2.** Binding energy of receptor-ligand complex for the template (A) and modelled complex between Geldanamycin and swine HSP90AB1 (B) during MD simulations (10 ns).  $\Delta E_{\text{vdw}}$  refer to van der Waal energy,  $\Delta E_{\text{elec}}$  refer to electrostatic energy,  $\Delta E_{\text{mm}}$  refer to total potential energy between the protein and ligand ( $\Delta E_{\text{mm}} = \Delta E_{\text{vdw}} + \Delta E_{\text{elec}}$ ),  $\Delta E_{\text{pol}}$  refer to polar solvation energy,  $\Delta E_{\text{apol}}$  refer to non-polar solvation energy and  $\Delta E_{\text{binding}}$  refer to the total binding energy ( $\Delta E_{\text{binding}} = \Delta E_{\text{mm}} + \Delta E_{\text{pol}} + \Delta E_{\text{apol}}$ ).

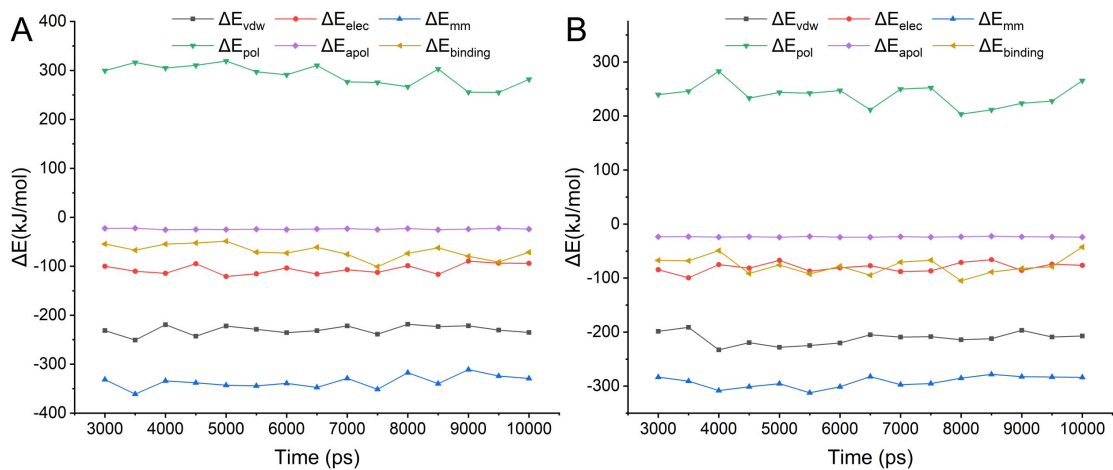

Supplement: supplementaryFigures_2.pdf [file supplementaryFigures_2.pdf]
